# Supplementary material for: Near-field emission profiling of tropical forest and Cerrado fires in Brazil during SAMBBA 2012
Source: Copernicus journal article supplement (doi:10.5194/acp-18-5619-2018), 2018-04-24
Supplement: Supplementary file 1 [file acp-18-5619-2018-supplement.zip]

Archive with 3 entries (3 files):
- CIMG5973.JPG
- acp-18-5619-2018-supplement-title-page.pdf
- DSC00054.JPG
