# Supplementary material for: Near-field emission profiling of tropical forest and Cerrado fires in Brazil during SAMBBA 2012
Source: Copernicus journal article supplement (doi:10.5194/acp-18-5619-2018), 2018-04-24
Supplement: Supplementary file 1 [file acp-18-5619-2018-supplement.zip › acp-18-5619-2018-supplement-title-page.pdf]

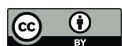

*Supplement of*

## **Near-field emission profiling of tropical forest and Cerrado fires in Brazil during SAMBBA 2012**

**Amy K. Hodgson et al.**

*Correspondence to:* William T. Morgan ([will.morgan@manchester.ac.uk](mailto:will.morgan@manchester.ac.uk))

- [acp-18-5619-2018-supplement-title-page.pdf](#)
- [CIMG5973.JPG](#)
- [DSC00054.JPG](#)

The copyright of individual parts of the supplement might differ from the CC BY 3.0 License.
