# Supplementary figures and images for: Near-field emission profiling of tropical forest and Cerrado fires in Brazil during SAMBBA 2012
Source: Copernicus journal article supplement (doi:10.5194/acp-18-5619-2018), 2018-04-24

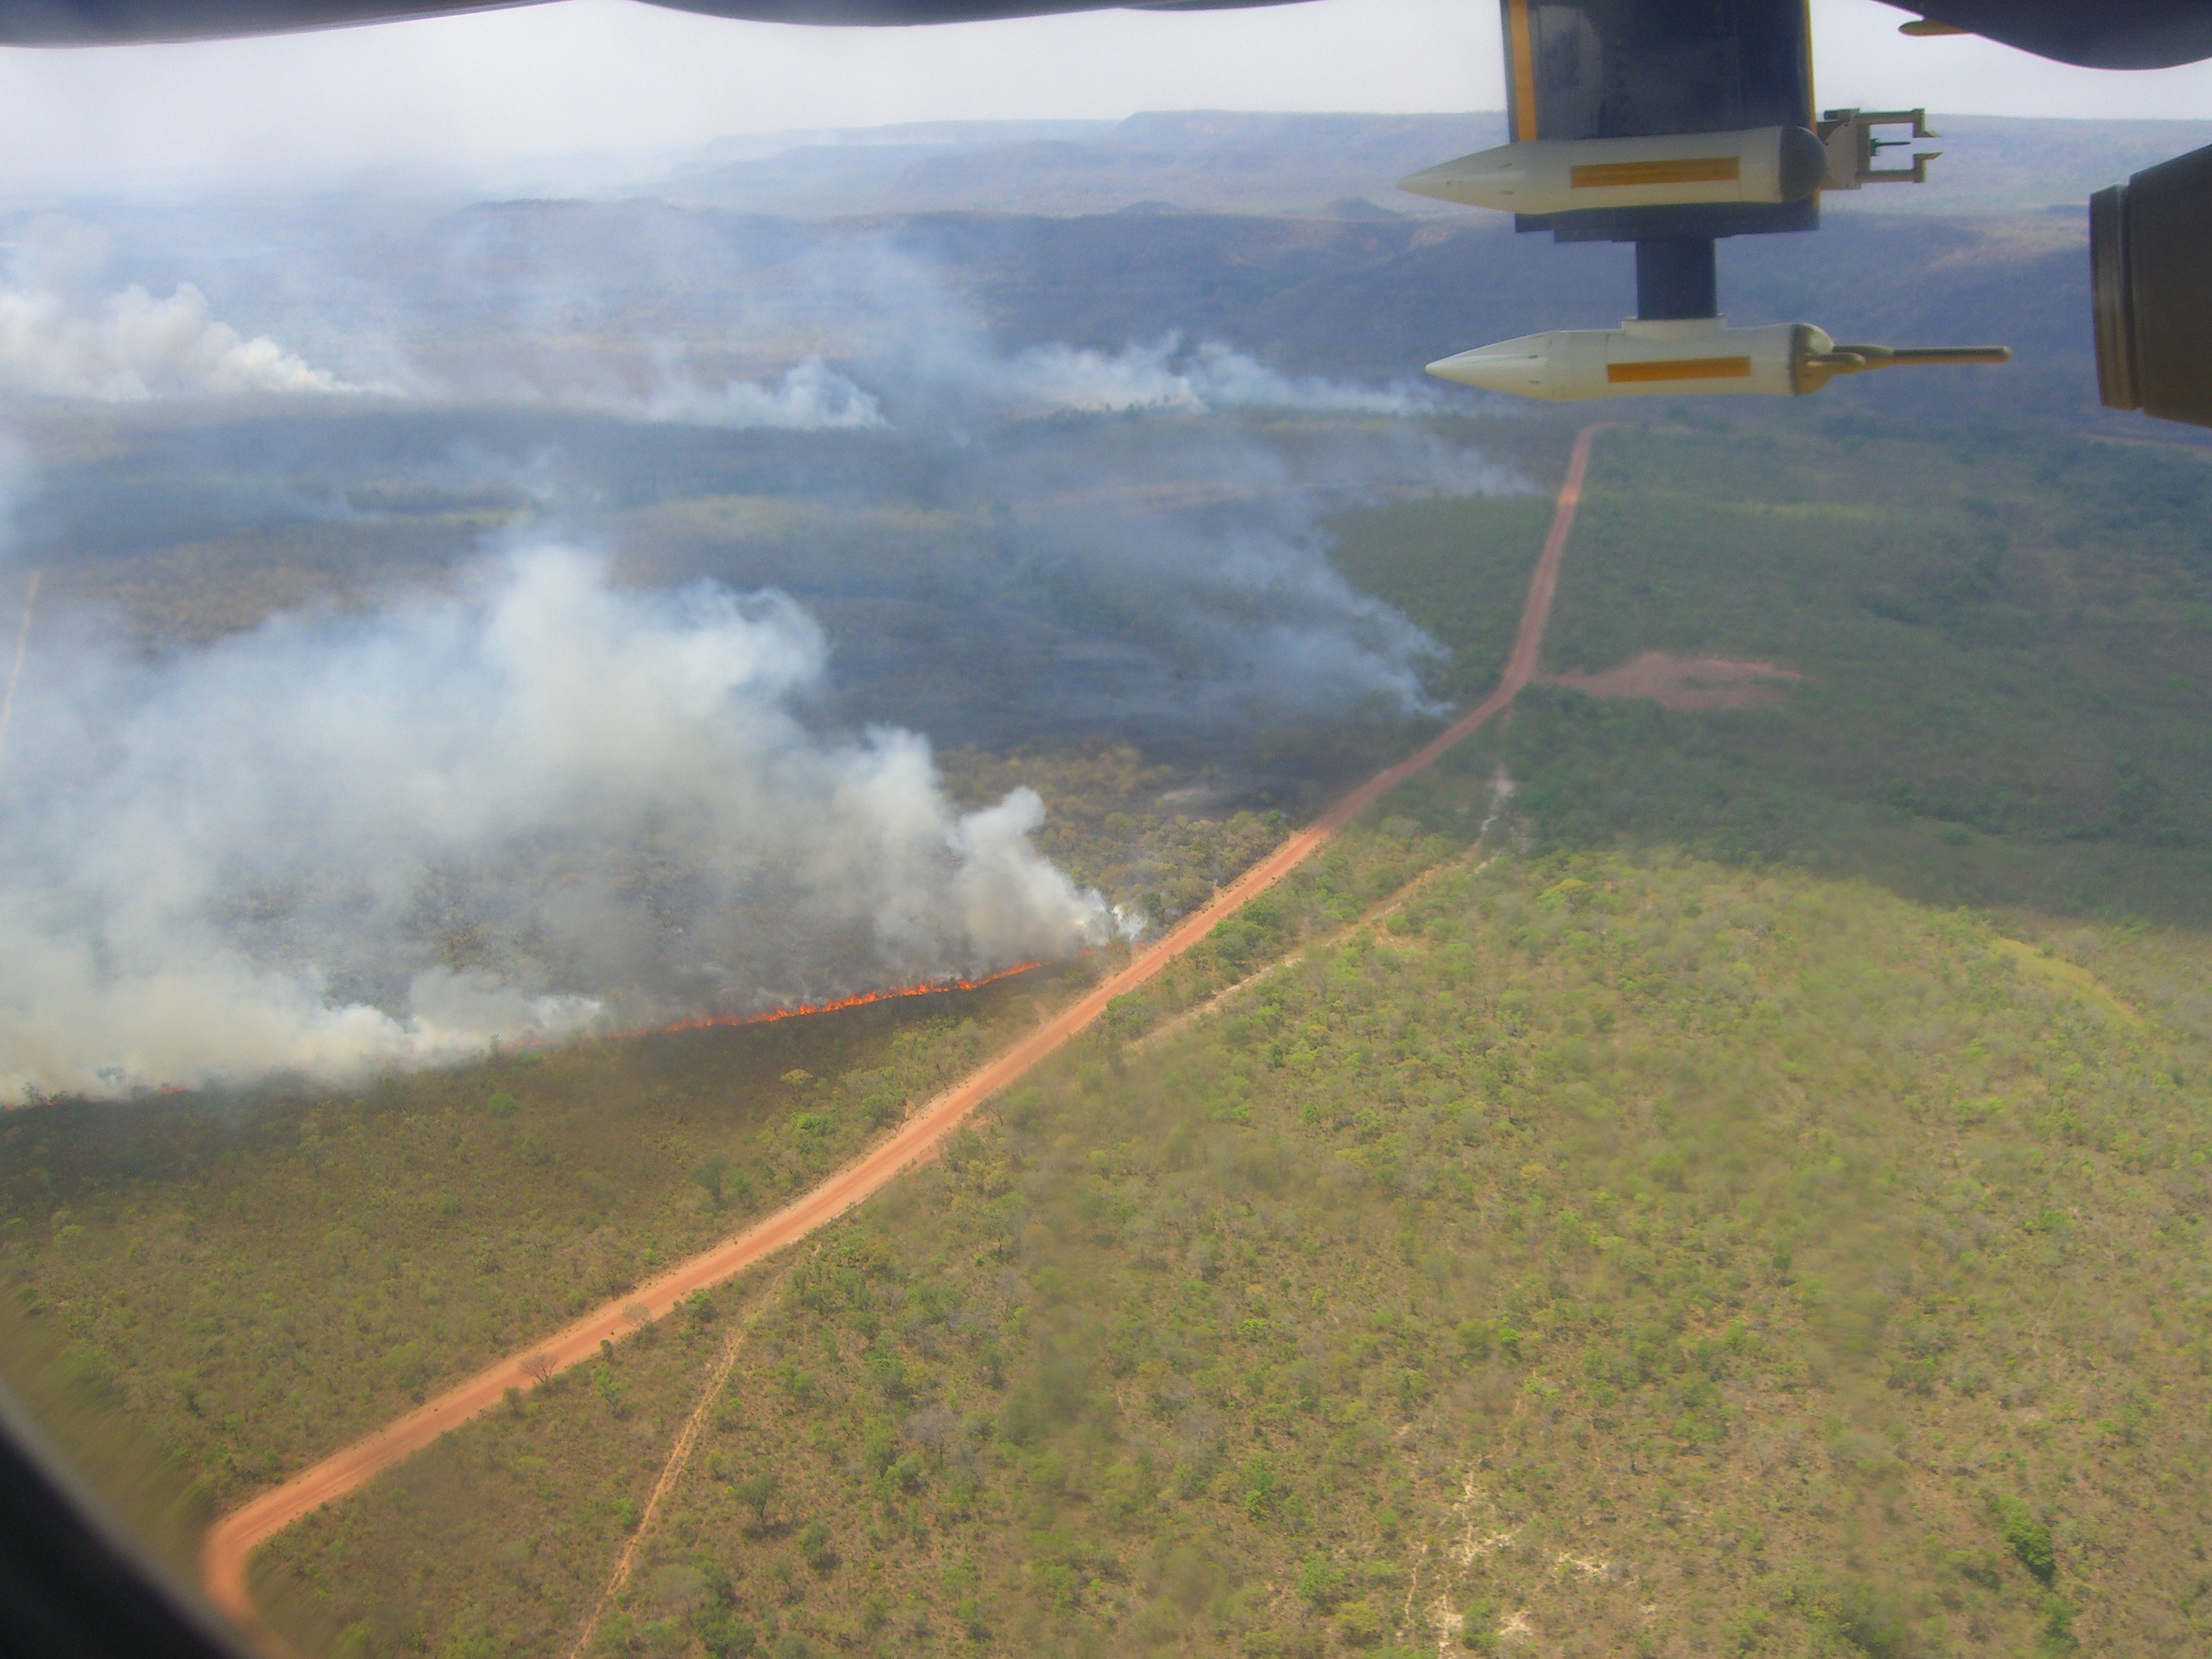

Supplement: Supplementary file 1 [file acp-18-5619-2018-supplement.zip › CIMG5973.JPG]

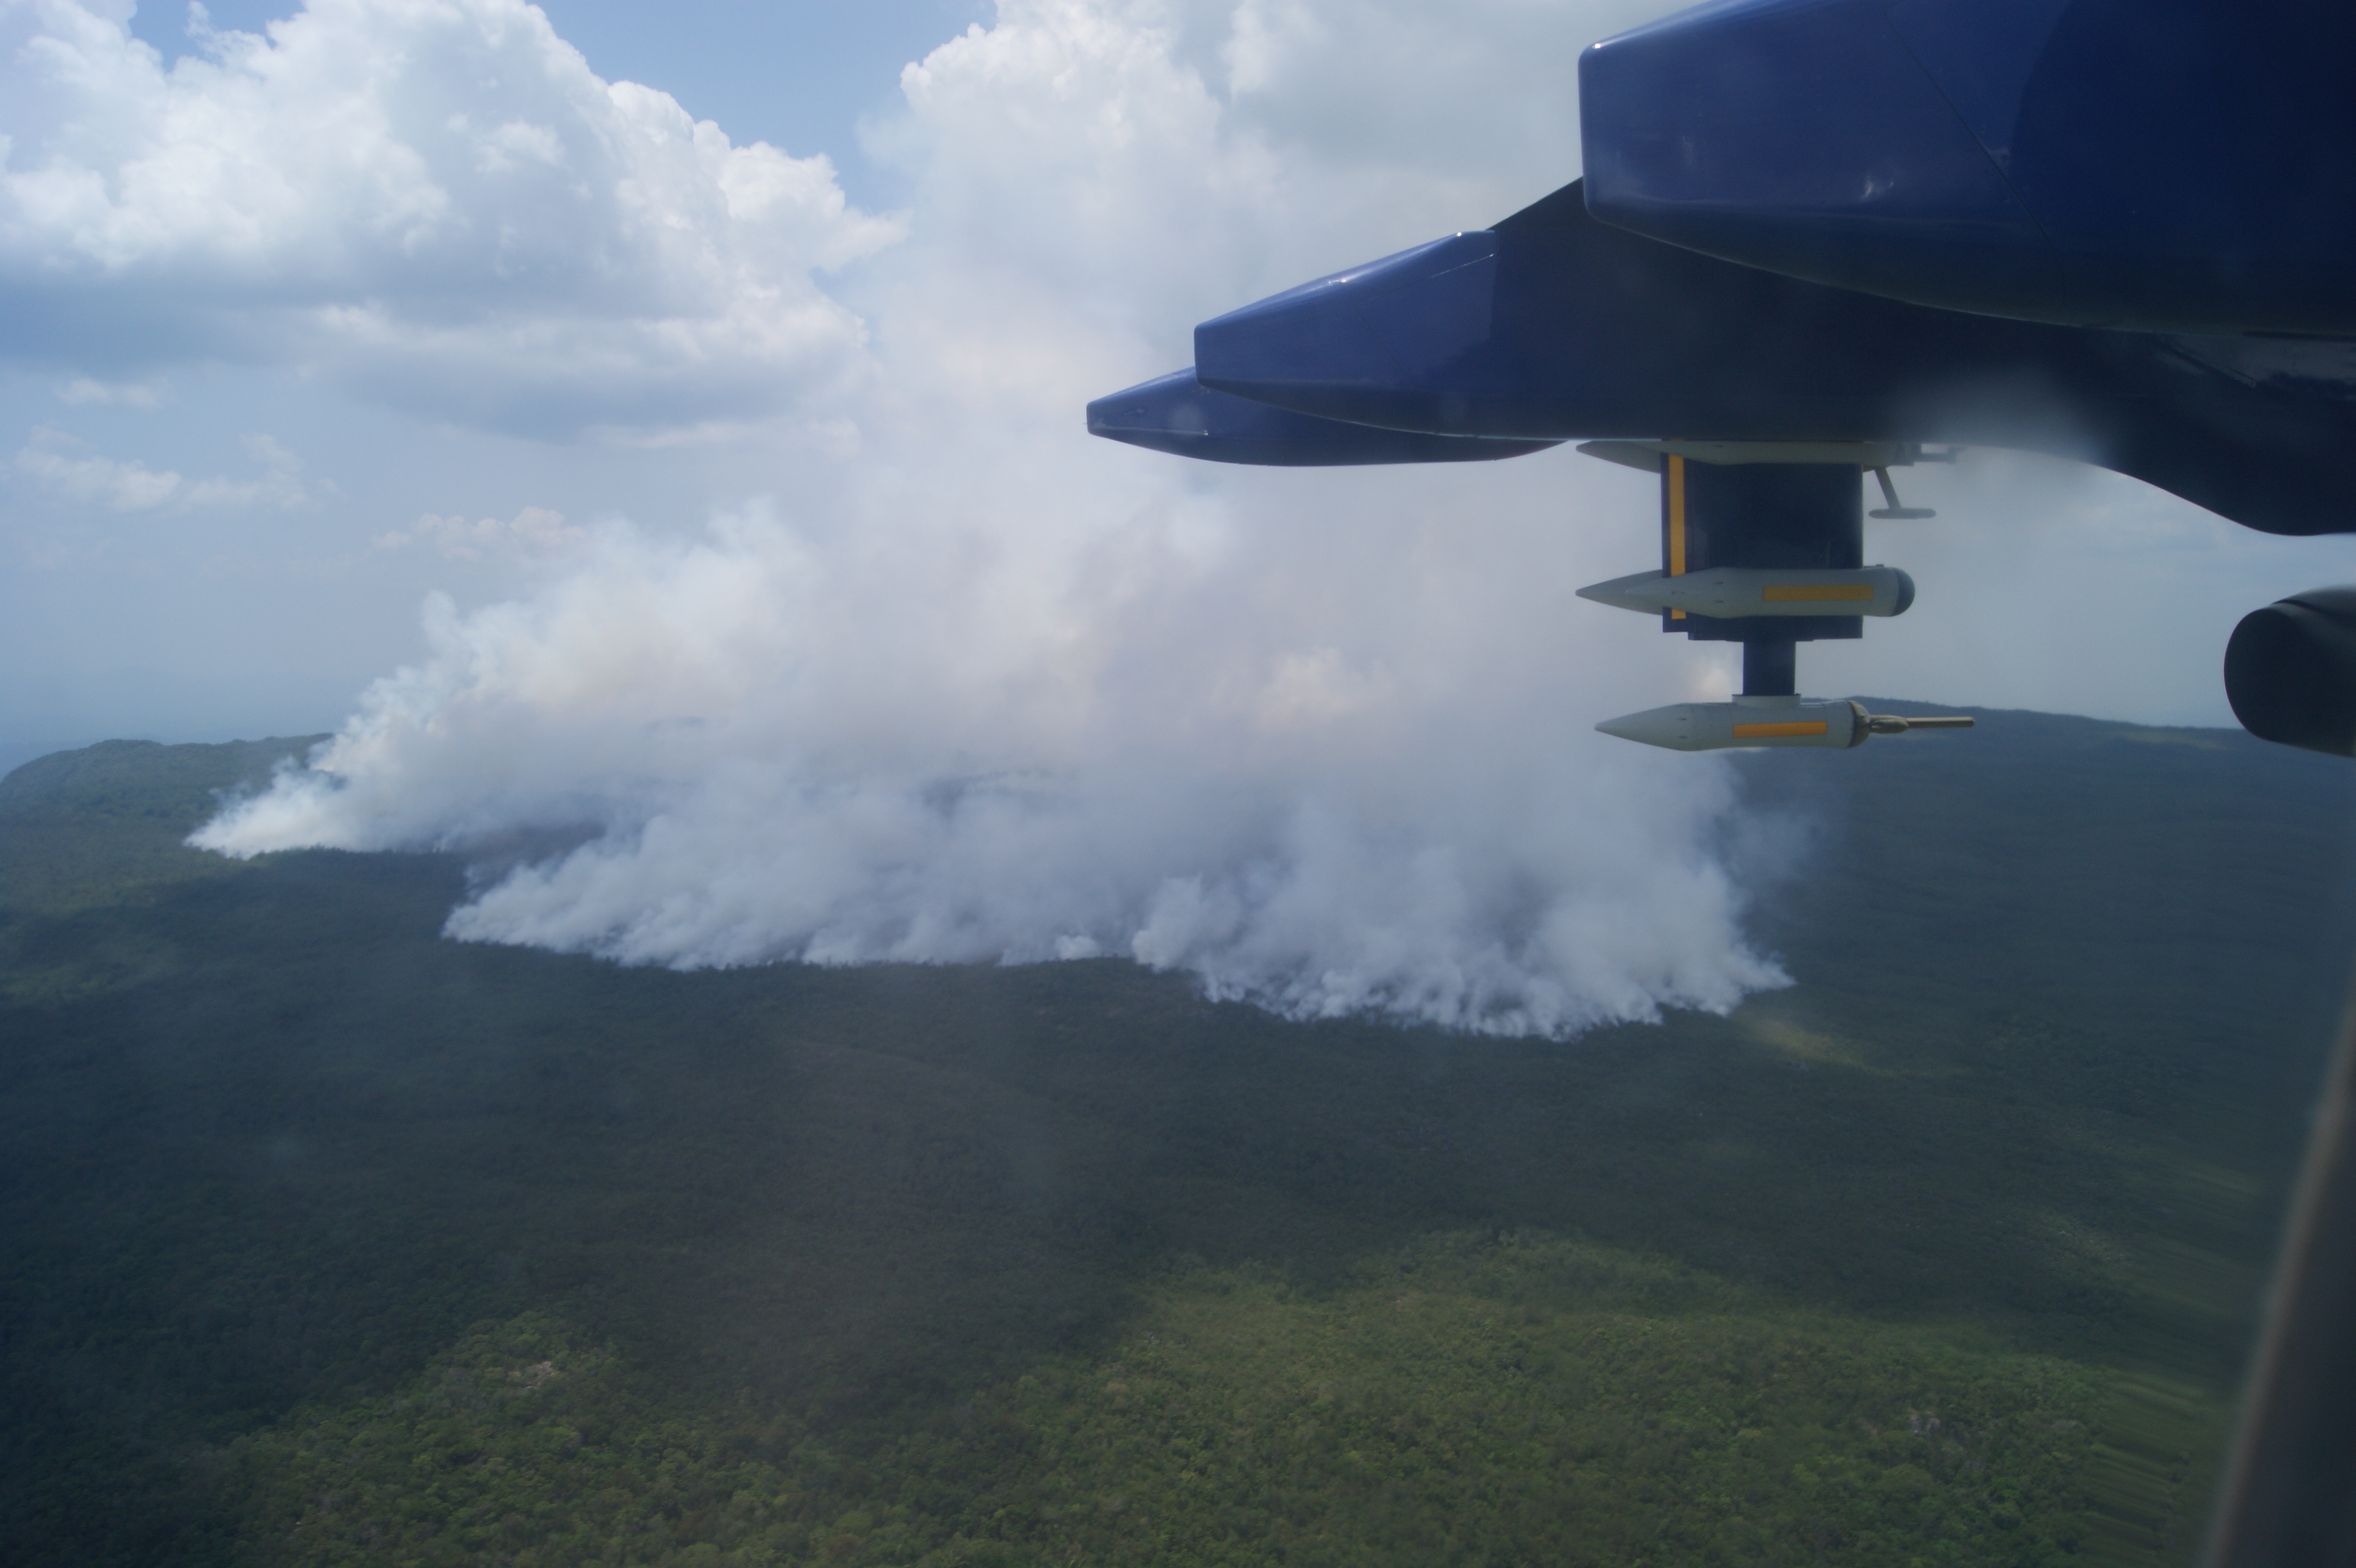

Supplement: Supplementary file 1 [file acp-18-5619-2018-supplement.zip › DSC00054.JPG]
